# Supplementary material
Source: MDPI journal article supplement (https://www.mdpi.com/2073-4433/12/11/1497)
Supplement: s1 [file s1]

# Impact of the Assimilation of Multi-Platform Observations on Heavy Rainfall Forecasts in Kong-Chi Basin and Thailand

Thippawan Thodsan <sup>1</sup>, Falin Wu <sup>1,\*</sup>, Kritanai Torsri <sup>2</sup>, Thakolpat Khampunson <sup>2</sup> and Gongliu Yang <sup>1</sup>

<sup>1</sup> SNARS Laboratory, School of Instrumentation and Optoelectronic Engineering, Beihang University, Beijing 100191, China; thippawan@buaa.edu.cn (T.T.); yanggongliu@buaa.edu.cn (G.Y.)

<sup>2</sup> Hydro-Informatics Institute, Ministry of Higher Education, Science, Research and Innovation, Bangkok 10900, Thailand; kritanai@hii.or.th (K.T.); thakolpat@hii.or.th (T.K.)

\* Correspondence: falin.wu@buaa.edu.cn

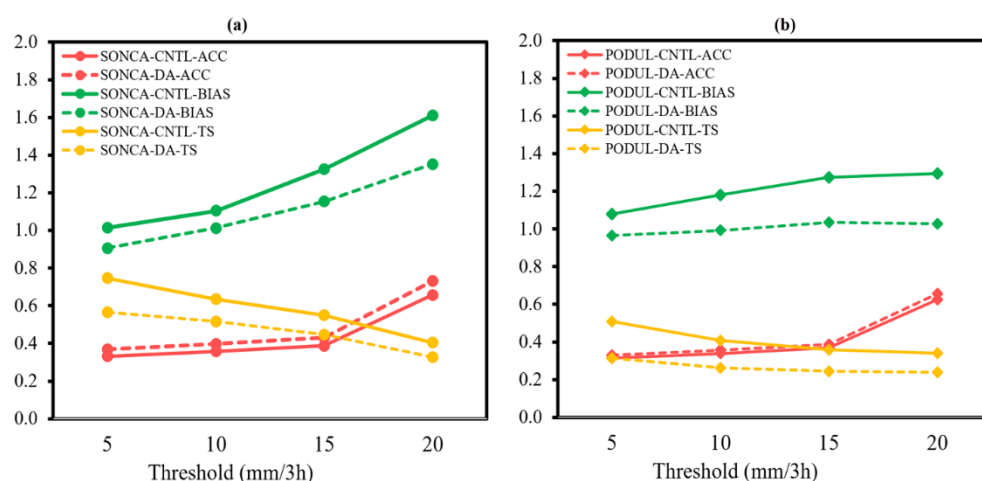

**Figure S1.** Statistical skill scores at the different thresholds of rainfall (mm) (a) SONCA event (b) PODUL event.
